# Supplementary material for: Experimental validation and pan-cancer analysis identified COL10A1 as a novel oncogene and potential therapeutic target in prostate cancer
Source: publisher site journal article supplement (doi:10.18632/aging.205337), 2023-12-21
Supplement: Supplementary file [file aging-v15i24-205337-supplementary-material-SD1.pdf]

SUPPLEMENTARY FIGURES

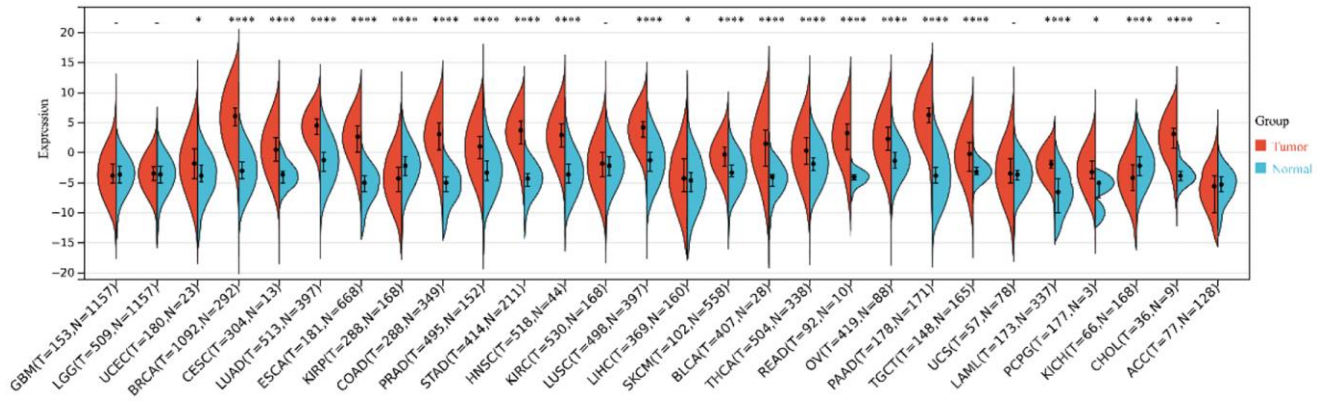

Supplementary Figure 1. The Sangerbox website analyzed the results of differential expression of COL10A1 in pan-cancer after combining data from TCGA and GTEx databases.

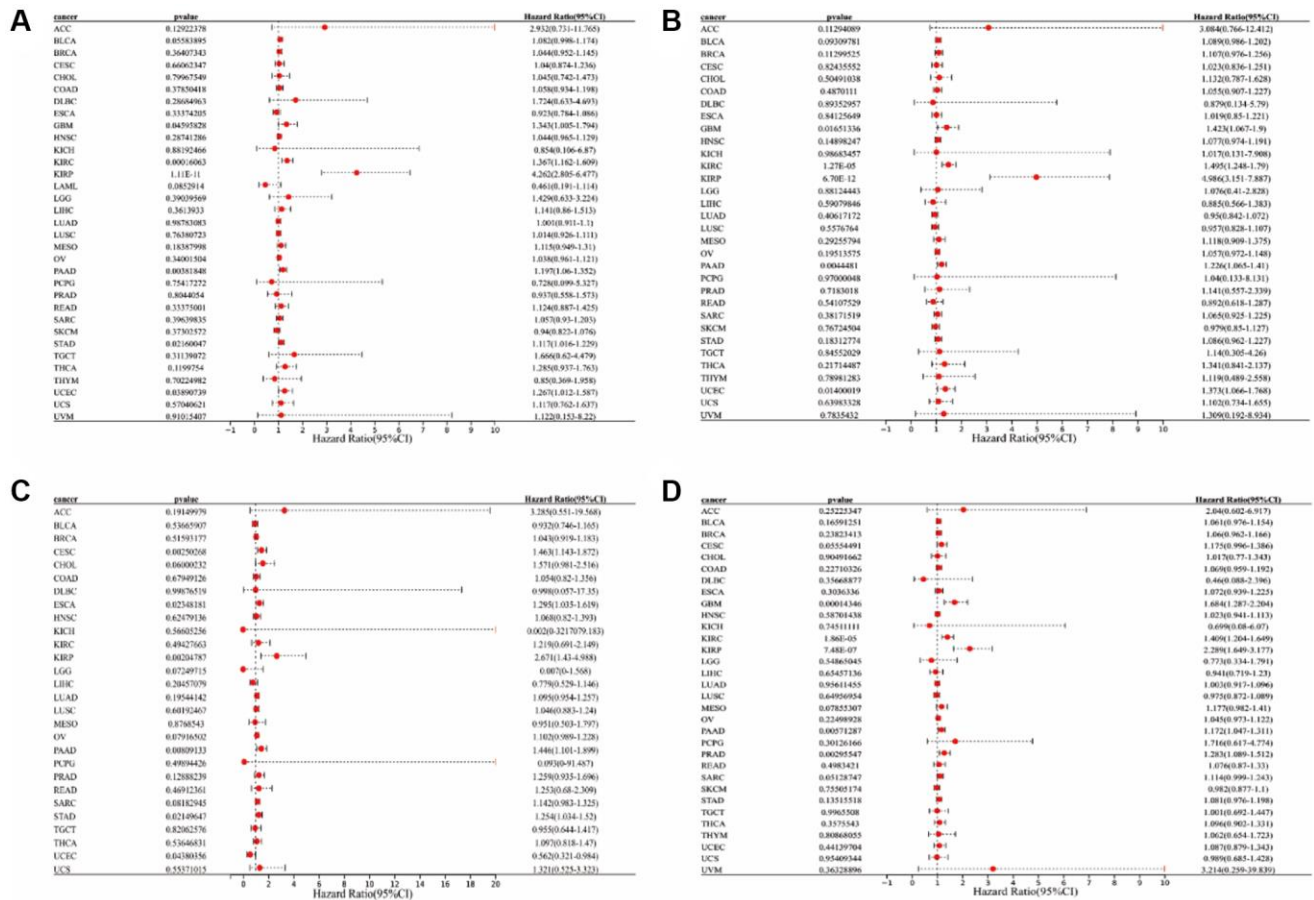

Supplementary Figure 2. Cox regression analysis of COL10A1 in pan-cancer. OS (A), DSS (B), DFS (C), PFS (D).

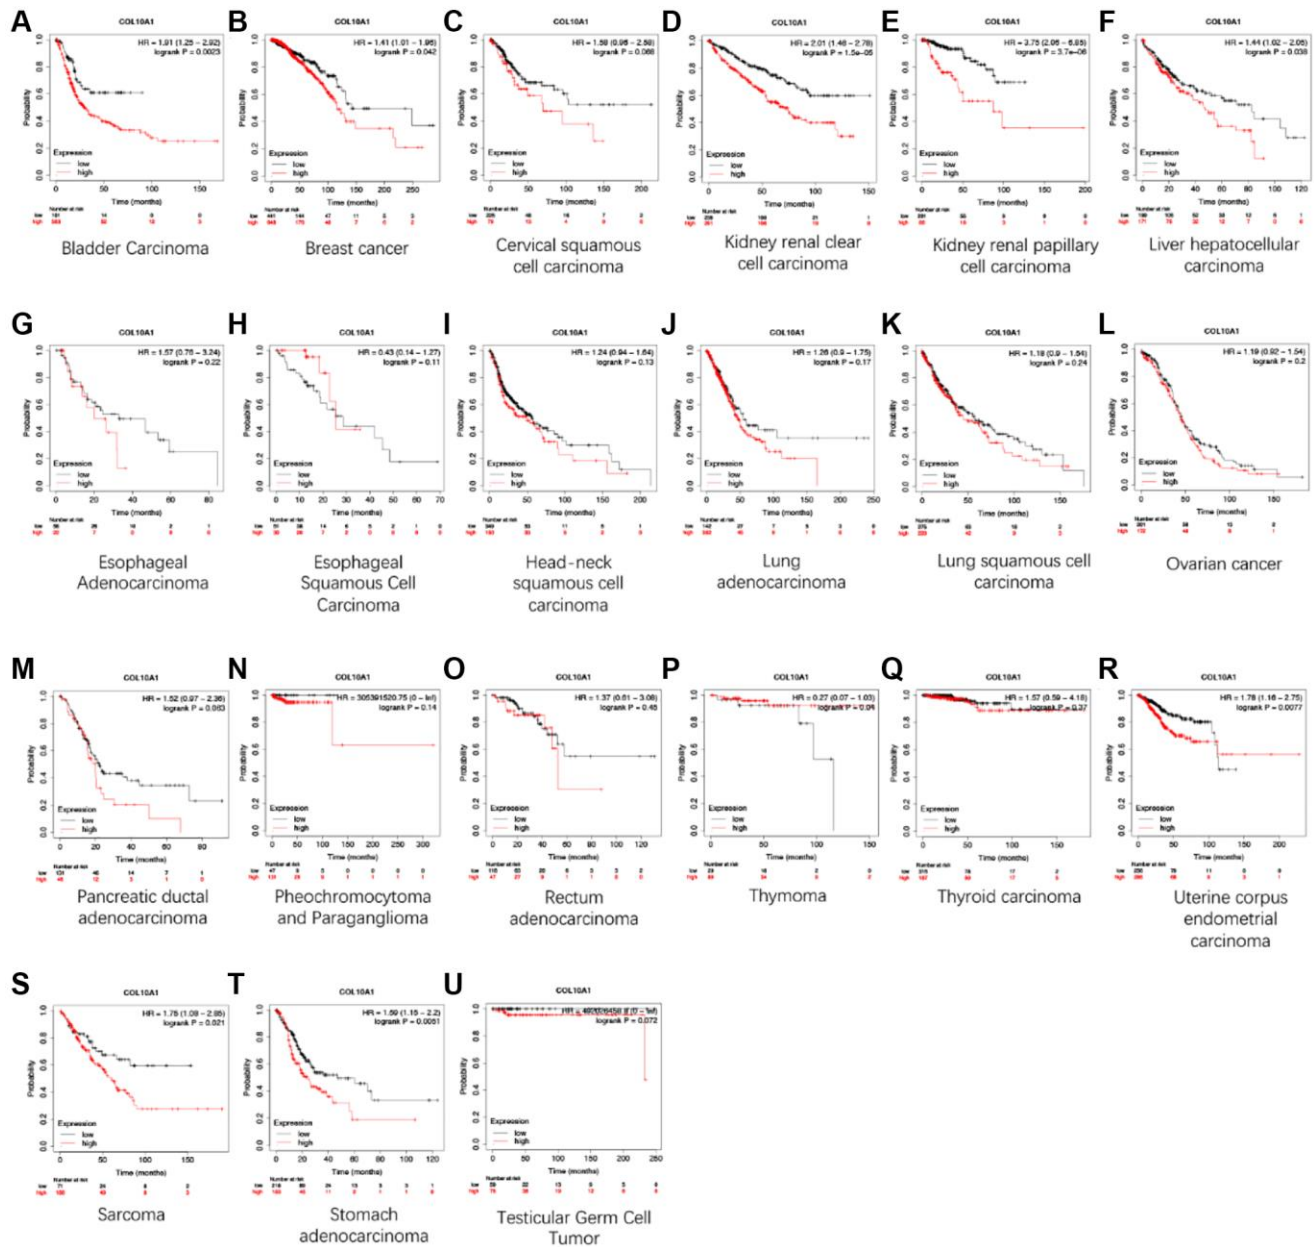

**Supplementary Figure 3.** The prognostic value of COL10A1 expression on overall survival time in pan-cancer was analyzed using Kaplan-Meier plotter (A-U).

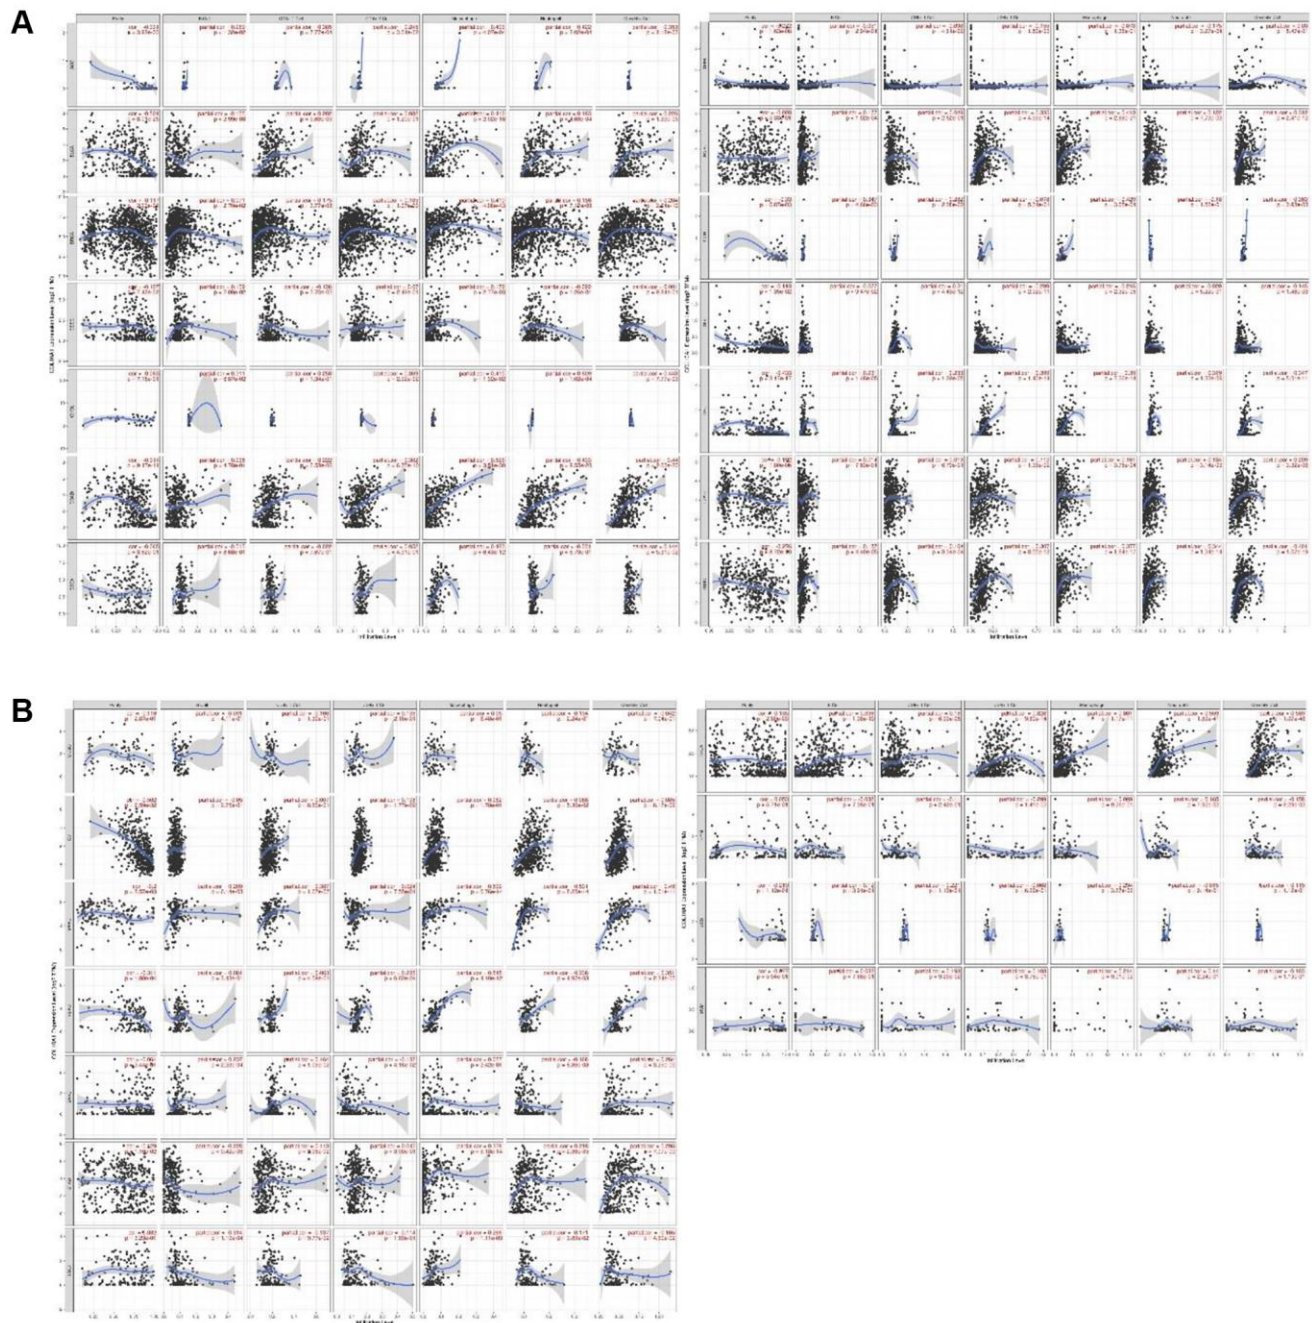

**Supplementary Figure 4. (A, B) Results of the remaining immune cell infiltration.**

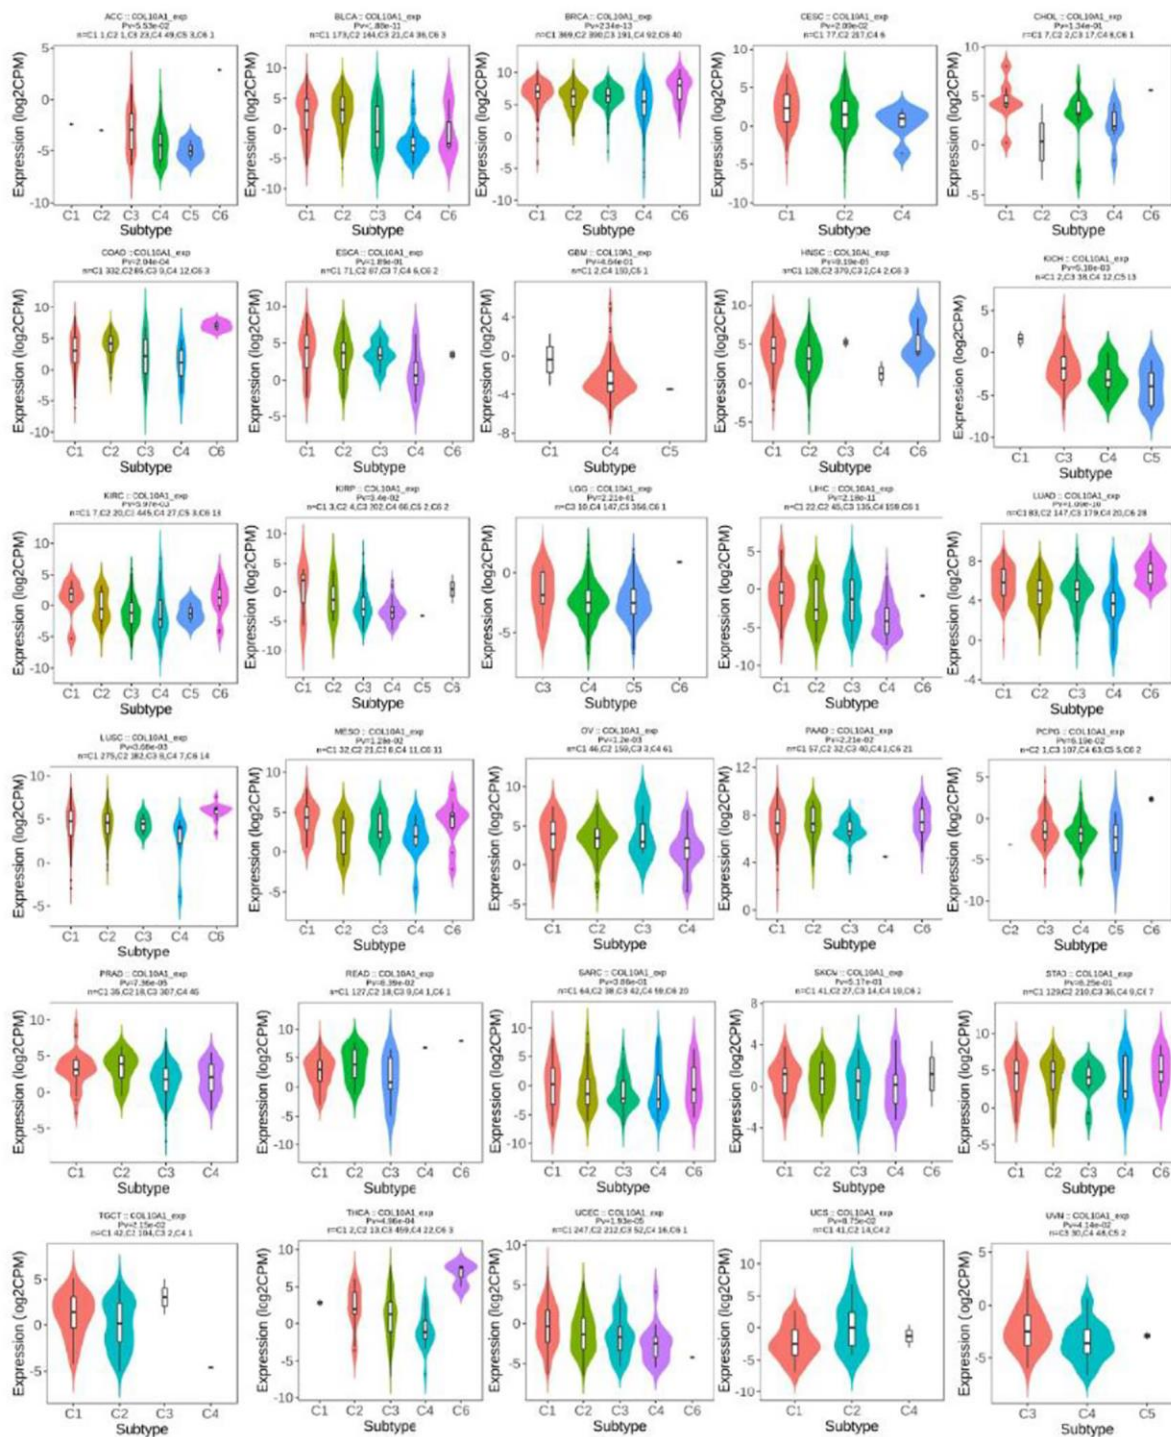

Supplementary Figure 5. TISIDB database on the relationship between pan-cancer COL10A1 expression and immunological subtypes.

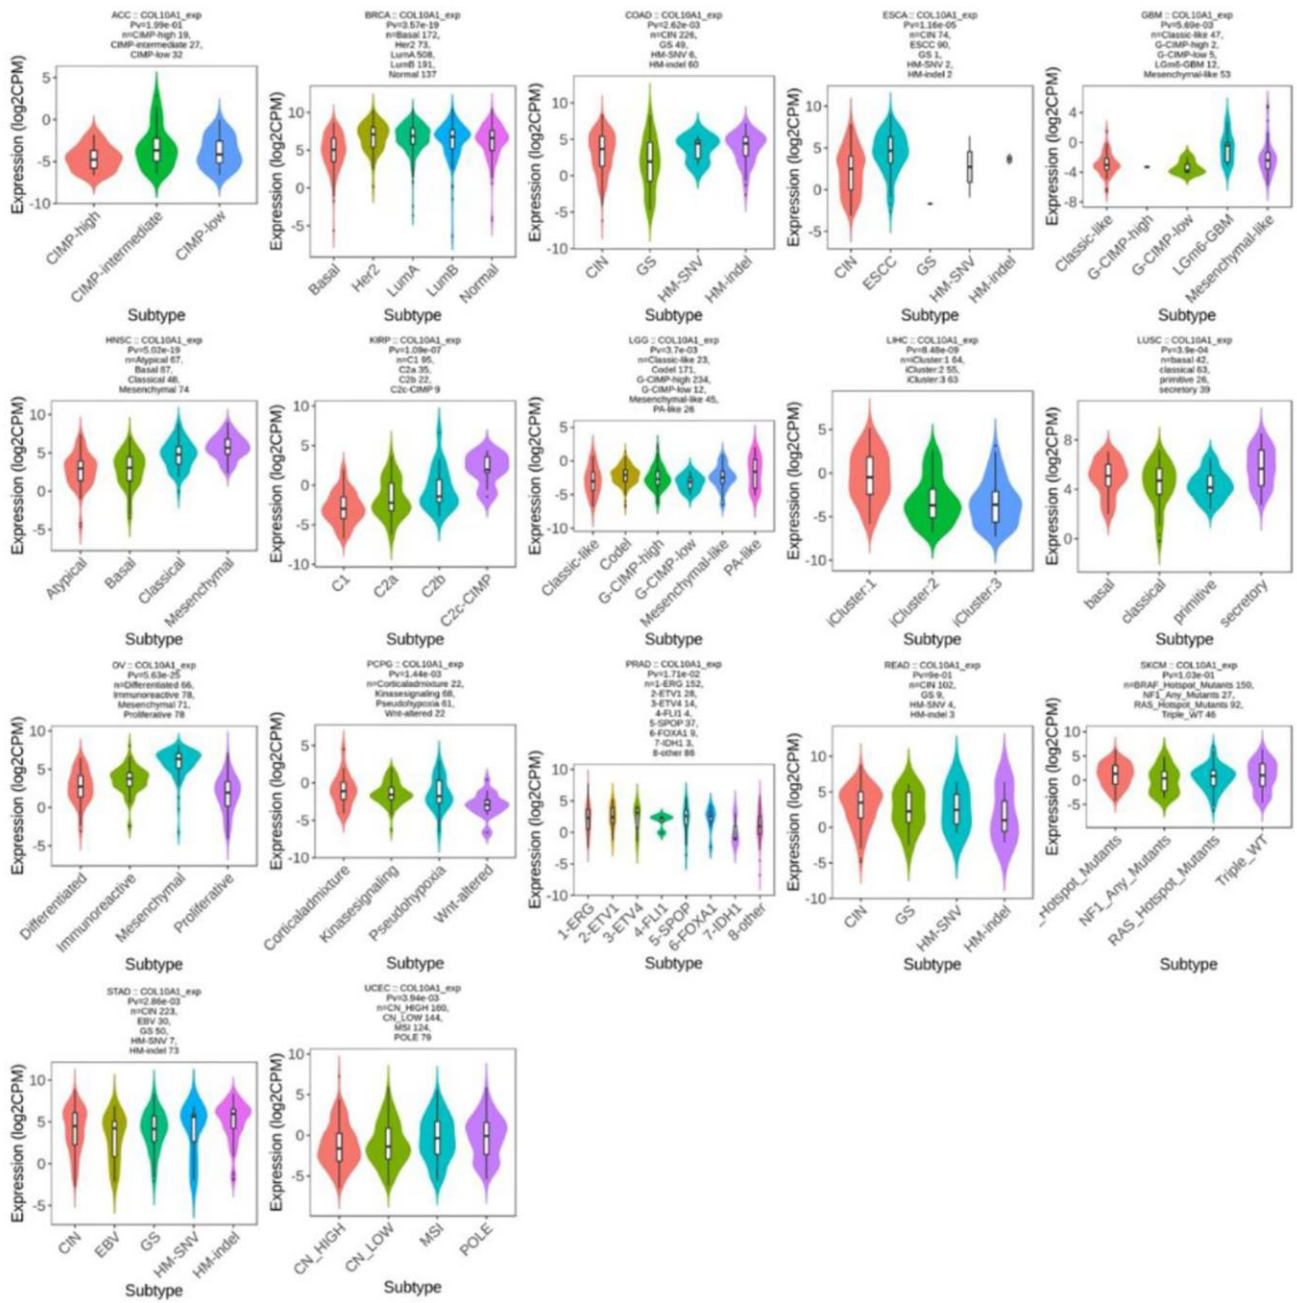

Supplementary Figure 6. TISIDB database on the relationship between pan-cancer COL10A1 expression and molecular subtypes.

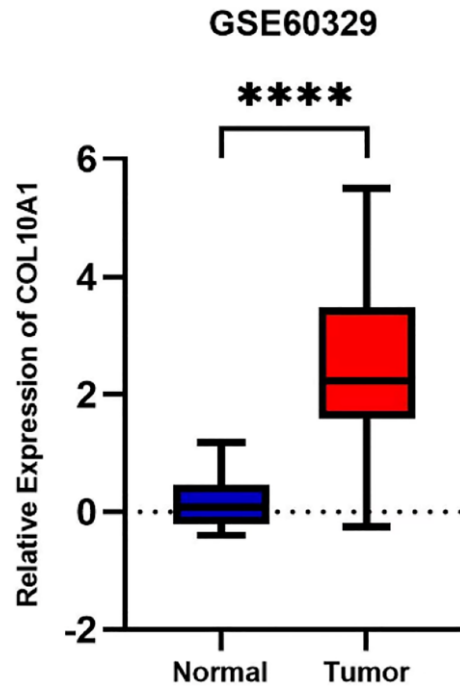

Supplementary Figure 7. Expression trends of COL10A1 in GEO databases GSE60329.
