# Supplementary material for: Experimental validation and pan-cancer analysis identified COL10A1 as a novel oncogene and potential therapeutic target in prostate cancer
Source: publisher site journal article supplement (doi:10.18632/aging.205337), 2023-12-21
Supplement: Supplementary file [file aging-v15i24-205337-supplementary-material-SD2.pdf]

## SUPPLEMENTARY TABLES

**Supplementary Table 1. Abbreviations and details of the 33 cancer types used in this study.**

| <b>Abbreviation</b> | <b>Detail</b>                                                    |
|---------------------|------------------------------------------------------------------|
| ACC                 | Adrenocortical carcinoma                                         |
| BLCA                | Bladder urothelial carcinoma                                     |
| BRCA                | Breast invasive carcinoma                                        |
| CESC                | Cervical squamous cell carcinoma and endocervical adenocarcinoma |
| CHOL                | Cholangiocarcinoma                                               |
| COAD                | Colon adenocarcinoma                                             |
| DLBC                | Lymphoid neoplasm diffuse large B-cell lymphoma                  |
| ESCA                | Esophageal carcinoma                                             |
| GBM                 | Glioblastoma multiforme                                          |
| HNSC                | Head and neck squamous cell carcinoma                            |
| KICH                | Kidney chromophobe                                               |
| KIRC                | Kidney renal clear cell carcinoma                                |
| KIRP                | Kidney renal papillary cell carcinoma                            |
| LAML                | Acute myeloid leukemia                                           |
| LGG                 | Brain lower grade glioma                                         |
| LIHC                | Liver hepatocellular carcinoma                                   |
| LUAD                | Lung adenocarcinoma                                              |
| LUSC                | Lung squamous cell carcinoma                                     |
| MESO                | Mesothelioma                                                     |
| OV                  | Ovarian serous cystadenocarcinoma                                |
| PAAD                | Pancreatic adenocarcinoma                                        |
| PCPG                | Pheochromocytoma and paraganglioma                               |
| PRAD                | Prostate adenocarcinoma                                          |
| READ                | Rectum adenocarcinoma                                            |
| SARC                | Sarcoma                                                          |
| SKCM                | Skin cutaneous melanoma                                          |
| STAD                | Stomach adenocarcinoma                                           |
| TGCT                | Testicular germ cell tumors                                      |
| THCA                | Thyroid carcinoma                                                |
| THYM                | Thymoma                                                          |
| UCEC                | Uterine corpus endometrial carcinoma                             |
| UCS                 | Uterine carcinosarcoma                                           |
| UVM                 | Uveal melanoma                                                   |

**Supplementary Table 2. The relationship between COL10A1 gene expression and the prognosis of different cancers in Prognoscan.**

| <b>Gene</b> | <b>Dataset</b> | <b>Cancer type</b> | <b>Endpoint</b> | <b>N</b> | <b>Cox P-value</b> | <b>HR</b> | <b>95% CI (low-high)</b> |
|-------------|----------------|--------------------|-----------------|----------|--------------------|-----------|--------------------------|
| COL10A1     | GSE2034        | Breast cancer      | DFS             | 286      | 0.00989            | 1.3       | 1.06–1.58                |
| COL10A1     | GSE17536       | Colorectal cancer  | DFS             | 145      | 0.000163           | 1.54      | 1.23–1.93                |
| COL10A1     | GSE14333       | Colorectal cancer  | DFS             | 226      | 0.000307           | 1.39      | 1.16–1.66                |
| COL10A1     | GSE17537       | Colorectal cancer  | DFS             | 55       | 0.037971           | 1.27      | 1.01–1.60                |
| COL10A1     | GSE26712       | Ovarian cancer     | DFS             | 185      | 0.038843           | 1.22      | 1.01–1.48                |
| COL10A1     | GSE30929       | Soft tissue cancer | DFS             | 140      | 0.04401            | 1.29      | 1.01–1.65                |
| COL10A1     | GSE13507       | Bladder cancer     | DSS             | 165      | 0.002572           | 1.83      | 1.24–2.71                |
| COL10A1     | GSE3494-GPL96  | Breast cancer      | DSS             | 236      | 0.039744           | 0.77      | 0.60–0.99                |
| COL10A1     | GSE17536       | Colorectal cancer  | DSS             | 177      | 0.000248           | 1.37      | 1.16–1.63                |
| COL10A1     | GSE13507       | Bladder cancer     | OS              | 165      | 0.035124           | 1.51      | 1.03–2.22                |
| COL10A1     | GSE4412-GPL96  | Brain cancer       | OS              | 74       | 0.034852           | 1.45      | 1.03–2.06                |
| COL10A1     | GSE17536       | Colorectal cancer  | OS              | 177      | 0.003222           | 1.23      | 1.07–1.41                |
| COL10A1     | GSE31210       | Lung cancer        | OS              | 204      | 0.030322           | 1.69      | 1.05–2.71                |
| COL10A1     | GSE9891        | Ovarian cancer     | OS              | 278      | 0.001333           | 1.17      | 1.06–1.28                |
| COL10A1     | GSE1379        | Breast cancer      | RFS             | 60       | 0.039888           | 1.76      | 1.03–3.01                |
| COL10A1     | GSE31210       | Lung cancer        | RFS             | 204      | 0.0119             | 1.55      | 1.10–2.17                |
